# Supplementary material for: Regulation of Splicing Factors by Alternative Splicing and NMD Is Conserved between Kingdoms Yet Evolutionarily Flexible
Source: PubMed Central journal article supplement (PMC4379411; doi:10.1093/molbev/msv002), 2015-03-03
Supplement: supp_msv002_lareau_supporting.resub.pdf [file supp_msv002_lareau_supporting.resub.pdf]

**Supporting online material - Regulation of splicing factors by alternative splicing and NMD is conserved between kingdoms yet evolutionarily flexible**

| species                | gene       | genome source           | locus                         | representative gene model or mRNA | alt splicing? | intron retention? | upstream junction ESTs | downstream junction ESTs | exon skipped ESTs | upstream junction intron retention | downstream junction intron retention | full intron retention | early polyA |
|------------------------|------------|-------------------------|-------------------------------|-----------------------------------|---------------|-------------------|------------------------|--------------------------|-------------------|------------------------------------|--------------------------------------|-----------------------|-------------|
| <i>H. sapiens</i>      | SRSF5      | UCSC hg19               | chr14:70233834-70238721       | NM_006925                         | y             | y                 | 20                     | 5                        | 52                | 87                                 | 68                                   | 5                     | 0           |
| <i>M. musculus</i>     | SRSF5      | UCSC mm9                | chr12:82046491-82051494       | NM_009159                         | y             | y                 | 2                      | 1                        | 56                | 45                                 | 33                                   | 4                     | 0           |
| <i>R. norvegicus</i>   | SRSF5      | UCSC m4                 | chr6:104728276-104732985      | NM_019257                         | y             | y                 | 11                     | 1                        | 35                | 56                                 | 27                                   | 1                     | 0           |
| <i>C. familiaris</i>   | SRSF5      | UCSC canFam2            | chr8:46549512-46554334        | ENSACFT00000026276                | y             | y                 | 0                      | 0                        | 5                 | 4                                  | 2                                    | 0                     | 0           |
| <i>G. gallus</i>       | SRSF5      | UCSC galGal3            | chr5:30163796-30168433        | NM_001031197                      | y             | y                 | 1                      | 0                        | 5                 | 14                                 | 3                                    | 1                     | 0           |
| <i>S. pombe</i>        | SRSF5a     | UCSC galGal3            | chr5:30595571-30612641        | NM_001006476                      | y             | y                 | 71                     | 40                       | 287               | 129                                | 85                                   | 0                     | 0           |
| <i>X. tropicalis</i>   | SRSF5      | UCSC xenTro2            | scaffold_246:1463821-1467713  | NM_001004783                      | y             | y                 | 1                      | 0                        | 22                | 3                                  | 7                                    | 0                     | 0           |
| <i>F. rubripes</i>     | lrf5.1     | UCSC xenTro2            | scaffold_145:876974-689926    | NM_001005638                      | y             | y                 | 1                      | 0                        | 30                | 1                                  | 2                                    | 0                     | 0           |
| <i>F. rubripes</i>     | SRSF5b     | UCSC fr2                | chrUn:166973539-166976388     | ENSTRUT00000045808                |               |                   | 0                      | 0                        | 0                 | 0                                  | 0                                    | 0                     | 0           |
| <i>D. rerio</i>        | SRSF5a     | UCSC fr2                | chrUn:270261895-270265478     | ENSTRUT00000027205                |               |                   | 0                      | 0                        | 0                 | 0                                  | 0                                    | 0                     | 0           |
| <i>D. rerio</i>        | SRSF5b     | UCSC denPer5            | chr20:38622161-38636988       | NM_001002610                      | y             | y                 | 5                      | 1                        | 18                | 10                                 | 3                                    | 0                     | 1           |
| <i>D. rerio</i>        | SRSF5a     | UCSC denPer5            | chr13:38246638-38251475       | NM_200867                         | y             | y                 | 11                     | 4                        | 176               | 43                                 | 9                                    | 1                     | 0           |
| <i>B. floridae</i>     | SRA A      | UCSC braFlot / JGI v1.0 | chrUn:254615939-254624358     | EST cluster 2801579:13            | y             |                   | 1                      | 1?                       | 76                | 1                                  | 0                                    | 0                     | 0           |
| <i>B. floridae</i>     | SRA B      | UCSC braFlot / JGI v1.0 | chrUn:309654001-309657174     | esiExt_lgenesh2_pg_C_920027       |               |                   |                        |                          |                   |                                    |                                      |                       |             |
| <i>S. purpuratus</i>   | SRA C      | UCSC braFlot / JGI v1.0 | chrUn:254826591-254835012     | esiExt_lgenesh2_pm_C_690014       | y             |                   | 1                      | 1?                       | 76                | 1                                  | 0                                    | 0                     | 0           |
| <i>S. purpuratus</i>   | SRA C      | UCSC strPur2            | Scaffold80892:724-9831        | CX551950, CX557651                | y             |                   | 1                      | 1                        | 26                | 0                                  | 1                                    | 0                     | 0           |
| <i>D. melanogaster</i> | B52        | UCSC dm3                | chr3RF:9487022-9492613        | NM_176488                         | y             | y                 | 10                     | 7                        | 82                | 9                                  | 2                                    | 1                     | 0           |
| <i>C. elegans</i>      | rsp-1      | UCSC ce6                | chrIII:11453896-11455723      | NM_064041                         | y             | y                 | 2                      | 0                        | 10                | 1                                  | 3                                    | 0                     | 0           |
| <i>C. elegans</i>      | rsp-2      | UCSC ce6                | chrIII:11451360-11452871      | NM_064040                         | y             | y                 | 0                      | 0                        | 15                | 1                                  | 1                                    | 1                     | 0           |
| <i>N. vectensis</i>    | NV 1       | JGI v1.0                | scaffold_11:472975-477003     | esiExt_lgenesh1_pg_C_110055       | y             |                   | 3                      | 4                        | 18                | 0                                  | 0                                    | 0                     | 0           |
| <i>N. vectensis</i>    | NV 2       | JGI v1.0                | scaffold_103:567405-570642    | 2667685_5                         | y             |                   | 1                      | 1                        | 52                | 1                                  | 0                                    | 0                     | 0           |
| <i>N. vectensis</i>    | NV 3       | JGI v1.0                | scaffold_318:144365-148353    | esiExt_lgenesh1_pg_C_3180016      | y             | y                 | 0                      | 0                        | 11                | 0                                  | 1                                    | 0                     | 0           |
| <i>N. vectensis</i>    | NV 4       | JGI v1.0                | scaffold_13:1331901-1334733   | esiExt_lgenesh1_pg_C_130169       | y             | y                 | 3                      | 1                        | 0                 | 0                                  | 2                                    | 0                     | 0           |
| <i>N. vectensis</i>    | NV 5       | JGI v1.0                | scaffold_379:94033-94596      | esiExt_lgenesh1_pg_C_3790006      |               |                   |                        |                          |                   |                                    |                                      |                       |             |
| <i>N. vectensis</i>    | NV 6       | JGI v1.0                | scaffold_95:614755-619479     | esiExt_lgenesh1_pg_C_930062       | y             | y                 | 3                      | 2                        | 20                | 0                                  | 1                                    | 0                     | 0           |
| <i>N. crassa</i>       | NCU07069   | Entrez Gene             | NW_001849796.1:c267299-265451 | XM_955241                         | y             |                   |                        |                          |                   |                                    |                                      |                       |             |
| <i>A. niger</i>        | An16g03890 | Entrez Gene             | NT_166531.1:c674159-871922    | XM_001397863                      | y             |                   |                        |                          |                   |                                    |                                      |                       |             |
| <i>S. pombe</i>        | srp2       | Entrez Gene             | NC_003424.3:c4426965-4425250  | NM_001019999                      | y             |                   |                        |                          |                   |                                    |                                      |                       |             |

**Table S1 – SRSF5 orthologs included in analysis.** Counts of ESTs and mRNAs showing alternative splicing are noted in the last columns (including partial evidence of intron retention, such as ESTs extending into the intron). We assigned temporary names to genes in *C. intestinalis*, *B. floridae*, *S. purpuratus*, and *N. vectensis* before phylogenetic classification

| species                | gene   | genome source | locus                      | representative gene model or mRNA     | alt splicing? | intron retention? | splicing in 2nd intron - upstream junction ESTs | splicing in 2nd intron - downstream junction ESTs | splicing in 2nd intron - exon skipped ESTs | splicing in 2nd intron - upstream junction intron retention | splicing in 2nd intron - downstream junction intron retention | splicing in 1st intron - upstream junction ESTs | splicing in 1st intron - downstream junction ESTs | splicing in 1st intron - exon skipped ESTs | splicing in 1st intron - upstream junction intron retention | splicing in 1st intron - downstream junction intron retention | splicing in 1st intron - full intron retention | early polyA |
|------------------------|--------|---------------|----------------------------|---------------------------------------|---------------|-------------------|-------------------------------------------------|---------------------------------------------------|--------------------------------------------|-------------------------------------------------------------|---------------------------------------------------------------|-------------------------------------------------|---------------------------------------------------|--------------------------------------------|-------------------------------------------------------------|---------------------------------------------------------------|------------------------------------------------|-------------|
| <i>H. sapiens</i>      | SRSF4  | UCSC hg19     | chr11:29474251-12950637    | NM_005626                             | Y (1, 2)      | Y (1, 2)          | 4                                               | 3                                                 | 157                                        | 4                                                           | 7                                                             | 1                                               | 0                                                 | 0                                          | 0                                                           | 0                                                             | 0                                              | 1           |
|                        | SRSF6  | UCSC hg19     | chr20:42066504-42092242    | NM_006275                             | Y             | Y                 | 58                                              | 6                                                 | 132                                        | 10                                                          | 9                                                             | 0                                               | 0                                                 | 0                                          | 0                                                           | 0                                                             | 0                                              | 1           |
| <i>M. musculus</i>     | SRSF4  | UCSC mm9      | chr4:131428554-131457640   | NM_020587                             | Y (1)         | Y (1)             | 0                                               | 0                                                 | 0                                          | 0                                                           | 0                                                             | 0                                               | 0                                                 | 0                                          | 0                                                           | 0                                                             | 0                                              | 0           |
|                        | SRSF6  | UCSC mm9      | chr2:162757244-162762854   | NM_026499                             | Y             | Y                 | 2                                               | 19                                                | 94                                         | 3                                                           | 19                                                            | 1                                               | 0                                                 | 0                                          | 0                                                           | 0                                                             | 0                                              | 0           |
| <i>R. norvegicus</i>   | SRSF4  | UCSC m4       | chr5:150731169-150758838   | NM_00116685                           | Y (1)         | Y                 | 0                                               | 0                                                 | 0                                          | 0                                                           | 0                                                             | 0                                               | 0                                                 | 0                                          | 0                                                           | 0                                                             | 0                                              | 0           |
|                        | SRSF6  | UCSC m4       | chr3:153795474-153800796   | NM_001014185                          | Y             | Y                 | 1                                               | 3                                                 | 23                                         | 0                                                           | 14                                                            | 0                                               | 0                                                 | 0                                          | 0                                                           | 0                                                             | 0                                              | 0           |
| <i>C. familiaris</i>   | SRSF4  | UCSC canFam2  | chr2:74296034-74323782     | BU751463, DN42514 (gap in 1st intron) |               |                   | 0                                               | 0                                                 | 0                                          | 0                                                           | 0                                                             | 0                                               | 0                                                 | 0                                          | 0                                                           | 0                                                             | 0                                              | 0           |
|                        | SRSF6  | UCSC canFam2  | chr24:34189662-34192538    | ENSCAF10000014759, DN355700           | Y             | Y                 | 1                                               | 1                                                 | 2                                          | 0                                                           | 1                                                             | 0                                               | 0                                                 | 0                                          | 0                                                           | 0                                                             | 0                                              | 0           |
| <i>G. gallus</i>       | SRSF4  | UCSC galGal3  | chr23:3043852-3048526      | BX936077, BX931065                    |               |                   | 0                                               | 0                                                 | 0                                          | 0                                                           | 0                                                             | 0                                               | 0                                                 | 0                                          | 0                                                           | 0                                                             | 0                                              | 0           |
|                        | SRSF6  | UCSC galGal3  | chr20:69285-74296          | NM_001030843 (gap in intron)          | Y             | Y                 | 0                                               | 3                                                 | 13                                         | 0                                                           | 3                                                             | 0                                               | 0                                                 | 0                                          | 0                                                           | 0                                                             | 0                                              | 0           |
| <i>X. tropicalis</i>   | SRSF4  | UCSC xenTro2  | scaffold_492:434541-441727 | OX803859                              | Y (2)         | Y (2)             | 0                                               | 1                                                 | 9                                          | 3                                                           | 10                                                            | 1                                               | 0                                                 | 0                                          | 0                                                           | 0                                                             | 0                                              | 0           |
|                        | SRSF6  | UCSC xenTro2  | scaffold_38:805274-814512  | NM_001001248                          | Y             | Y                 | 6                                               | 13                                                | 72                                         | 30                                                          | 7                                                             | 0                                               | 0                                                 | 0                                          | 0                                                           | 0                                                             | 0                                              | 0           |
| <i>F. rubripes</i>     | SRSF4  | UCSC f2       | chrUn:139844965-139897692  | ENSTRUT00000030178                    |               |                   | 0                                               | 0                                                 | 0                                          | 0                                                           | 0                                                             | 0                                               | 0                                                 | 0                                          | 0                                                           | 0                                                             | 0                                              | 0           |
|                        | SRSF6  | UCSC f2       | chrUn:355227627-355231373  | ENSTRUT00000007652                    | Y             | Y                 | 0                                               | 1                                                 | 0                                          | 0                                                           | 0                                                             | 0                                               | 0                                                 | 0                                          | 0                                                           | 0                                                             | 0                                              | 0           |
| <i>D. rerio</i>        | SRSF4  | UCSC danRer5  | chr19:23986960-23998837    | NM_199574                             |               | Y (2)             | 0                                               | 0                                                 | 84                                         | 11                                                          | 3                                                             | 0                                               | 0                                                 | 0                                          | 0                                                           | 0                                                             | 0                                              | 0           |
|                        | SRSF6a | UCSC danRer5  | chr23:3858771-3870268      | NM_219466                             |               |                   | 0                                               | 0                                                 | 7                                          | 0                                                           | 3                                                             | 0                                               | 0                                                 | 0                                          | 0                                                           | 0                                                             | 0                                              | 0           |
|                        | SRSF6b | UCSC danRer5  | chr11:391396-400003        | NM_001008732                          | Y             | Y                 | 1                                               | 2                                                 | 11                                         | 4                                                           | 3                                                             | 0                                               | 0                                                 | 0                                          | 0                                                           | 0                                                             | 0                                              | 0           |
| <i>C. intestinalis</i> | SF A   | UCSC c2       | chr01q:6846290-6849708     | AK116209                              | Y*            |                   | 0                                               | 0                                                 | 0                                          | 0                                                           | 0                                                             | 0                                               | 0                                                 | 0                                          | 0                                                           | 0                                                             | 0                                              | 0           |
|                        | SF B   | UCSC c2       | chr01q:6898465-68993171    | BW905692, BW324472                    | Y*            |                   | 0                                               | 0                                                 | 0                                          | 0                                                           | 0                                                             | 0                                               | 0                                                 | 0                                          | 0                                                           | 0                                                             | 0                                              | 0           |
|                        | SF C   | UCSC c2       | chr02q:6865682-6867083     | AK114189                              |               |                   | 0                                               | 0                                                 | 0                                          | 0                                                           | 0                                                             | 0                                               | 0                                                 | 0                                          | 0                                                           | 0                                                             | 0                                              | 0           |
|                        | SF D   | UCSC c2       | chr05q:4307321-4308319     | ESTs (unspliced in ORF)               |               |                   | 0                                               | 0                                                 | 0                                          | 0                                                           | 0                                                             | 0                                               | 0                                                 | 0                                          | 0                                                           | 0                                                             | 0                                              | 0           |
|                        | SF E   | UCSC c2       | chr05q:4319181-4321175     | AK112385                              |               |                   | 0                                               | 0                                                 | 0                                          | 0                                                           | 0                                                             | 0                                               | 0                                                 | 0                                          | 0                                                           | 0                                                             | 0                                              | 0           |

**Table S2 – SRSF4 and SRSF6 orthologs included in analysis.** As in table S1. “i1” indicates alternative splicing or intron retention in the first intron of SRSF4 orthologs, and “i2” indicates the second intron. All alternative splicing events in SRSF6 are in the second intron, and first-intron alternative splicing in SRSF4 was only observed in human, mouse, and rat, so many cells are not applicable and are left empty. Alternative splicing in *C. intestinalis* SR A and B was not homologous to alternative splicing in other species.

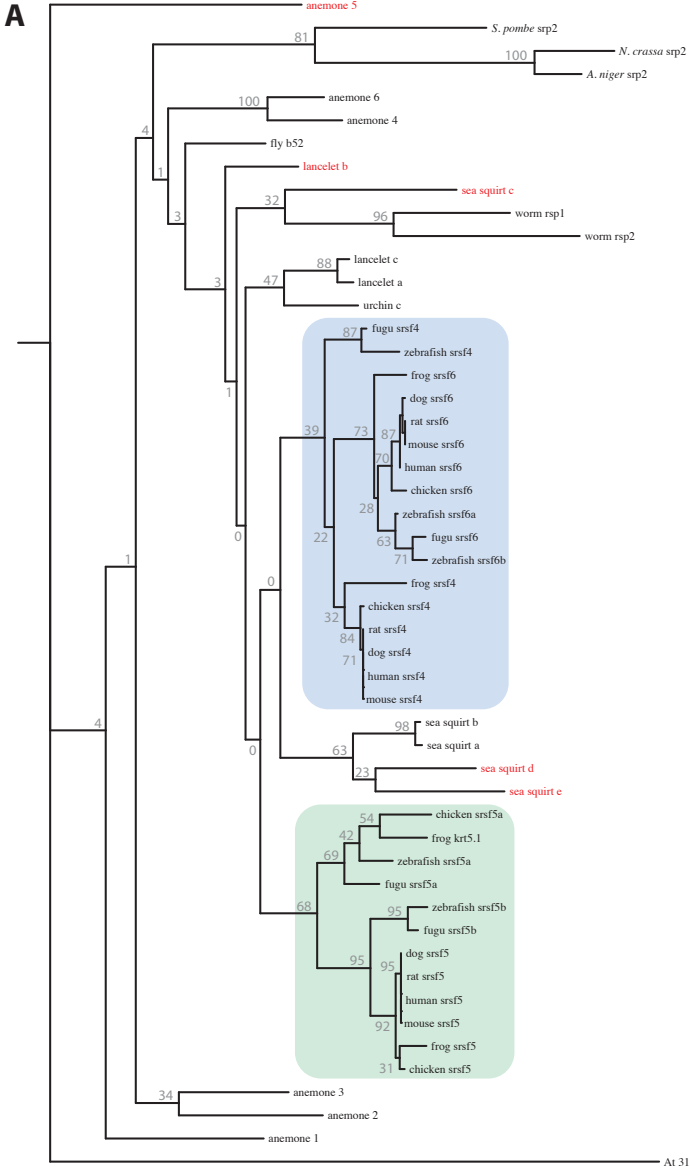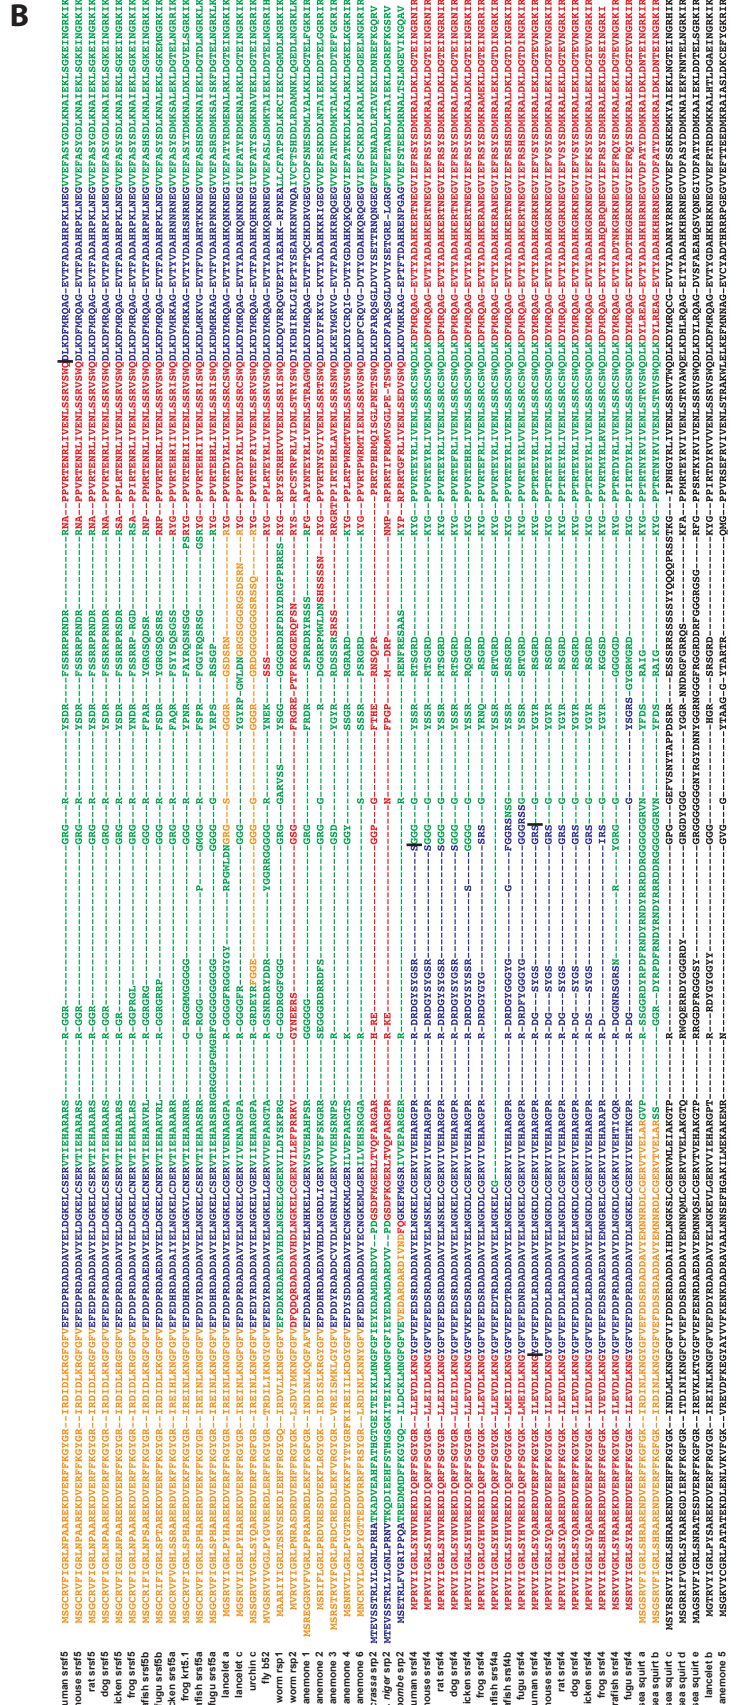

**Figure S1 – A.** Maximum likelihood tree of all animal and fungi SRSF4/5/6 genes, with bootstrap values. Vertebrate SRSF4/6 (blue) and SRSF5 (green) orthologs are grouped. Red indicates genes with no introns. **B.** Alignment of all SRSF4/5/6 protein sequences indicating exon positions. Colors denote exons. Sequences were trimmed after the second RRM domain before alignment. Black bars indicate the positions of alternative exons in human SRSF4, SRSF5, and SRSF6.

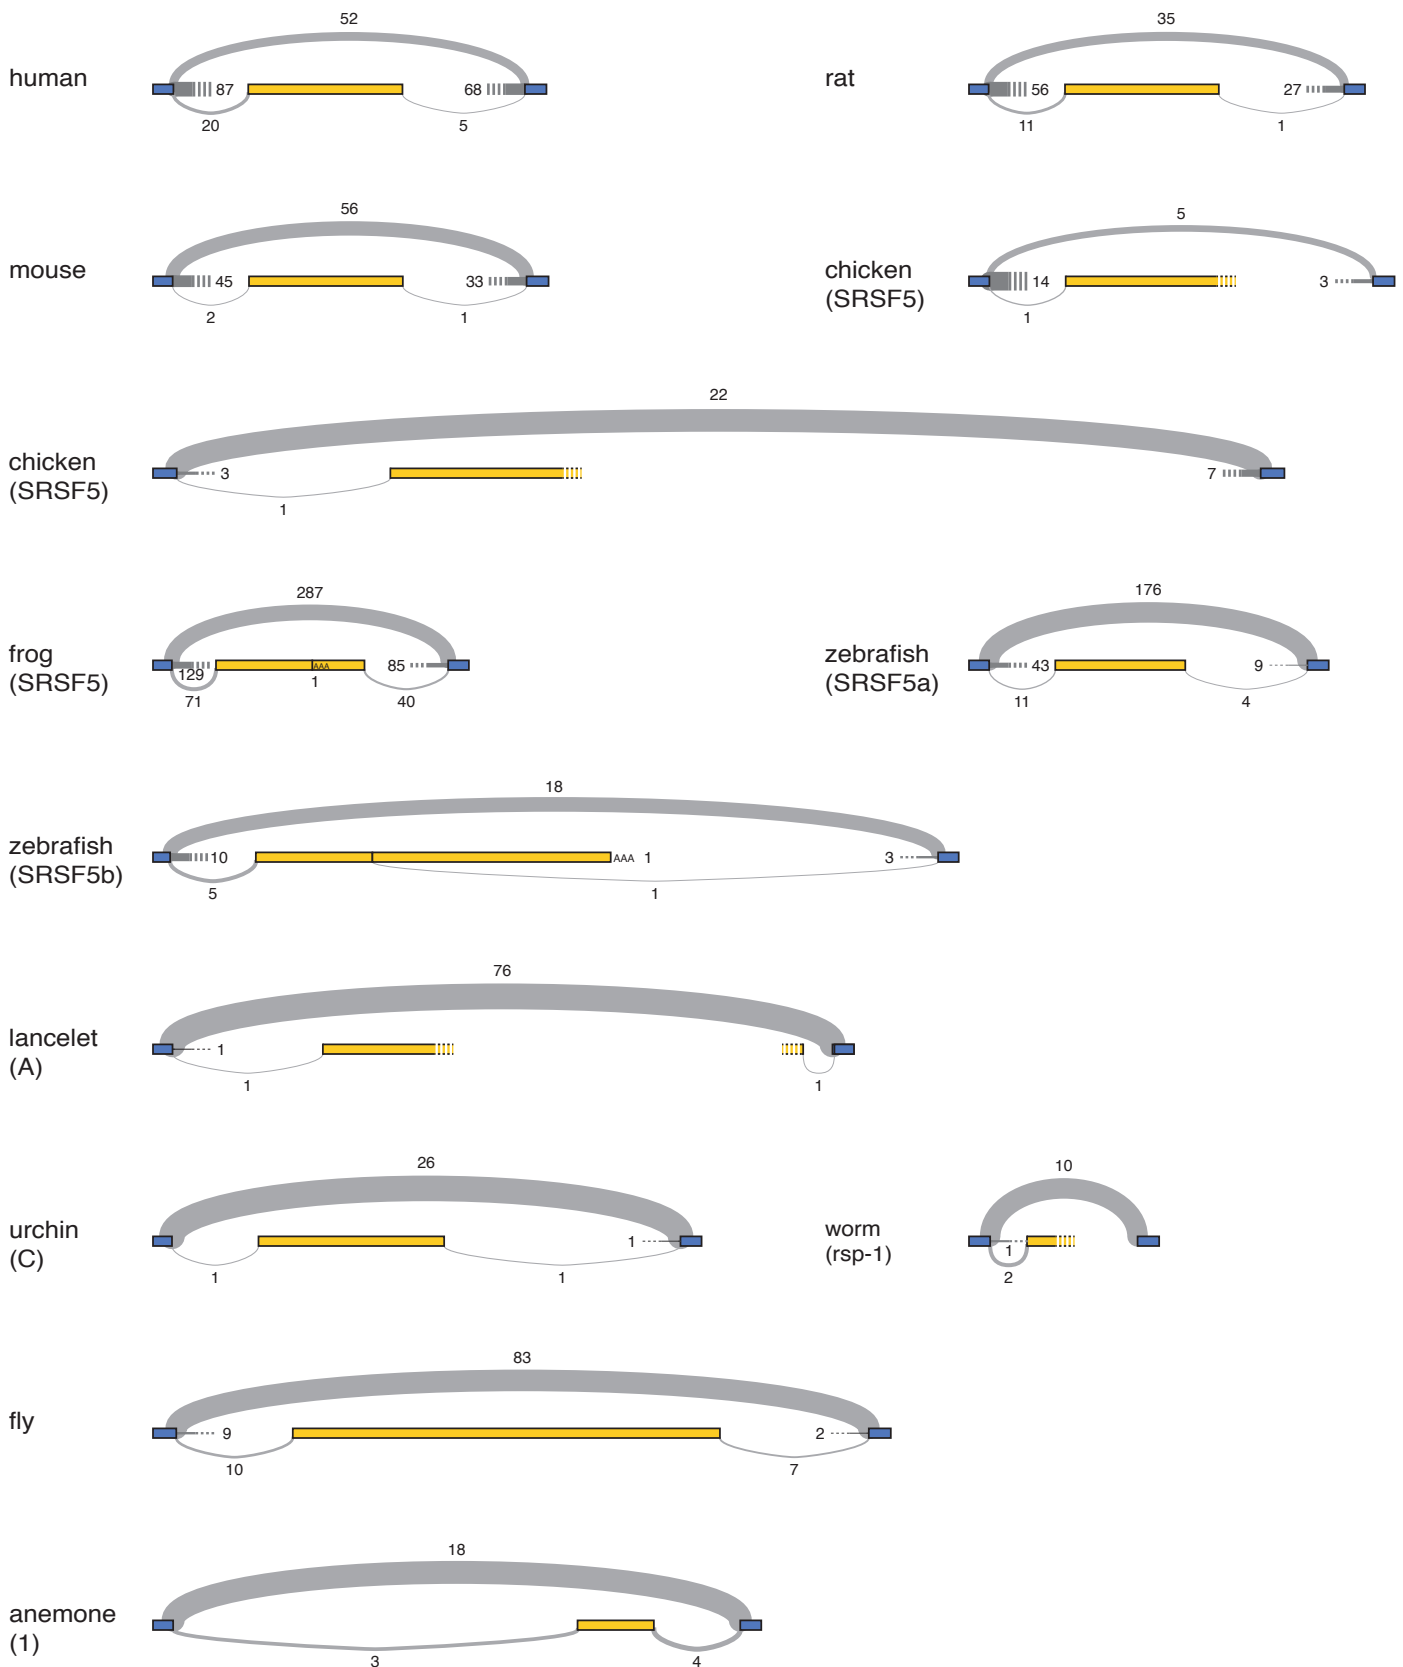

**Figure S2 – Transcript evidence for alternative splicing of SRSF5.** Alternative regions of each gene are shown with the upstream and downstream constitutive exons in blue and alternative exon in orange (to scale). Counts of ESTs and mRNAs showing alternative splicing are noted (including partial evidence of intron retention, such as ESTs extending into the intron) and splice junction lines are scaled to this count.
